# Supplementary material
Source: PubMed Central journal article supplement (PMC7339908)
Supplement: NIHMS1603435-supplement-supplementary_material.pdf [file NIHMS1603435-supplement-supplementary_material.pdf]

## Supplementary Materials for

### **Nucleoside-modified mRNA vaccination partially overcomes maternal antibody inhibition of de novo immune responses in mice**

Elinor Willis, Norbert Pardi, Kaela Parkhouse, Barbara L. Mui, Ying K. Tam, Drew Weissman, Scott E. Hensley\*

\*Corresponding author. Email: [hensley@pennmedicine.upenn.edu](mailto:hensley@pennmedicine.upenn.edu)

Published 8 January 2020, *Sci. Transl. Med.* **12**, eaav5701 (2020)

DOI: 10.1126/scitranslmed.aav5701

#### **The PDF file includes:**

Fig. S1. Efficiency of matAb transfer does not depend on litter size or mother's age.

#### **Other Supplementary Material for this manuscript includes the following:**

(available at [stm.sciencemag.org/cgi/content/full/12/525/eaav5701/DC1](http://stm.sciencemag.org/cgi/content/full/12/525/eaav5701/DC1))

Data file S1 (Microsoft Excel format). Individual subject-level data for Figs. 1 (B to H), 2 (B to E), 3 (A to D), 4 (B and C), 5 (B and C), and 6 (B and C) and fig. S1 (A to C).

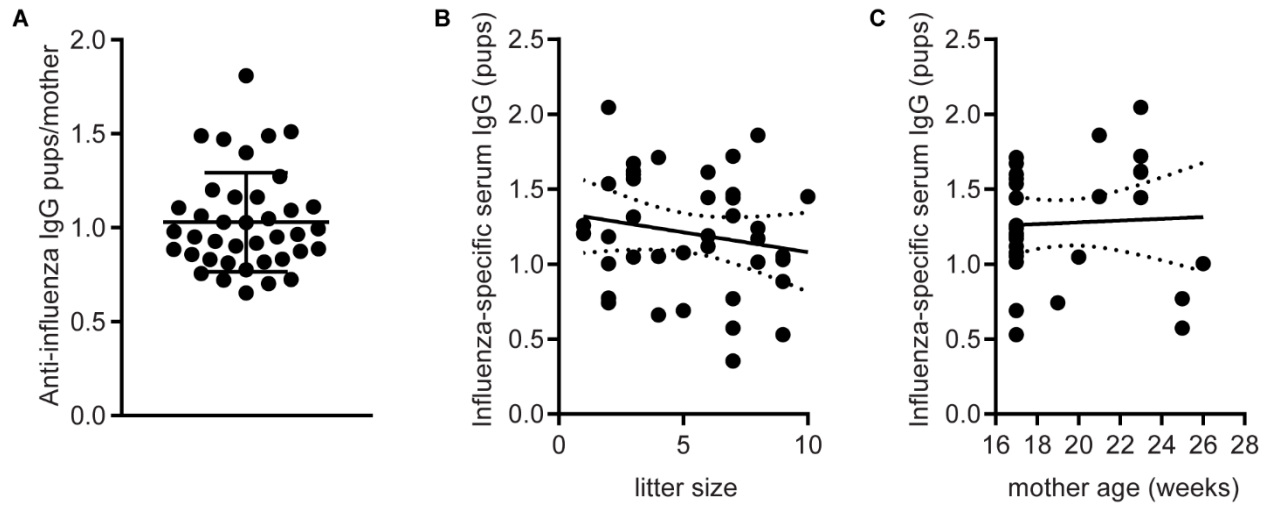

**Fig. S1. Efficiency of matAb transfer does not depend on litter size or mother's age.** (A-C) Serum was collected from mothers and pups on the day of weaning and influenza virus-specific antibody titers were measured by ELISA. Each point represents one litter (1-10 pups/litter, mean=5.3). (A) Pup:mother titer ratios are shown. Data are shown as mean  $\pm$  SD. (B,C) Litter size (B) or maternal age in weeks (C) is shown on the x axis and pup titers on the y axis; dotted line, 95% confidence interval ( $R^2 < 0.03$ ).
